# Supplementary material for: A Near-Infrared Ratiometric Fluorescent Probe for Highly Selective Recognition and Bioimaging of Cysteine
Source: Front Chem. 2019 Feb 1;7:32. doi: 10.3389/fchem.2019.00032 (PMC6367217; doi:10.3389/fchem.2019.00032)
Supplement: Supplementary file 1 [file Data_Sheet_1.docx]

Supplementary Material

A Near-Infrared Ratiometric Fluorescent Probe for Highly Selective Recognition and Bioimaging of Cysteine

Xuan Zhang1,2*, Li Zhang1,#, Wei-Wei Ma1,#, Yong Zhou1, Zhen-Ni Lu1 and Suying Xu3*

1 Key Laboratory of Science and Technology of Eco-Textiles, Ministry of Education, College of Chemistry, Chemical Engineering & Biotechnology, Donghua University, Shanghai 201620, China.

2State Key Laboratory of Fine Chemicals, Dalian University of Technology, Dalian 116024, China.

3Department of Biochemistry, Faculty of Science, Beijing University of Chemical Technology, Beijing 100029, China.

*** Correspondence:**Xuan Zhang and Suying Xu
xzhang@dhu.edu.cn; syxu@mail.buct.edu.cn

**#** These authors contributed equally to this work.

**Contents:**

**Figure S1** Fluorescence spectra of **2** in CHCl3, DMF and PBS solution (pH = 7.4) containing 50% DMF.

**Figure S2** ESI spectrum of **HBT-Cys** upon addition of 10 equiv of Cys.

**Figure S3** 1H NMR spectrum of **1**.

**Figure S4** 13C NMR spectrum of **1**.

**Figure S5** 1H NMR spectrum of **2**.

**Figure S6** 13C NMR spectrum of **2**.

**Figure S7** 1H NMR spectrum of **HBT-Cys**.

**Figure S8** 13C NMR spectrum of **HBT-Cys**.

**Figure S9** MALDI-TOF-MS spectrum of **2**.

**Figure S10** MALDI-TOF-MS spectrum of **HBT-Cys**.

## Supplementary Figures

**
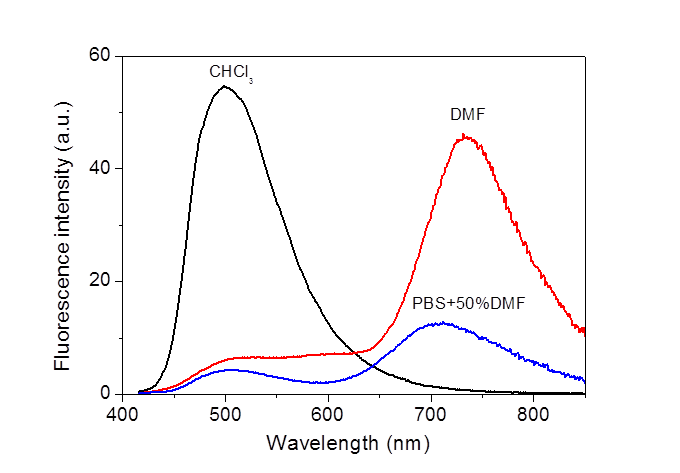
**

**Figure S1** Fluorescence spectra of **2** in CHCl3, DMF and PBS solution (pH = 7.4) containing 50% DMF.

**
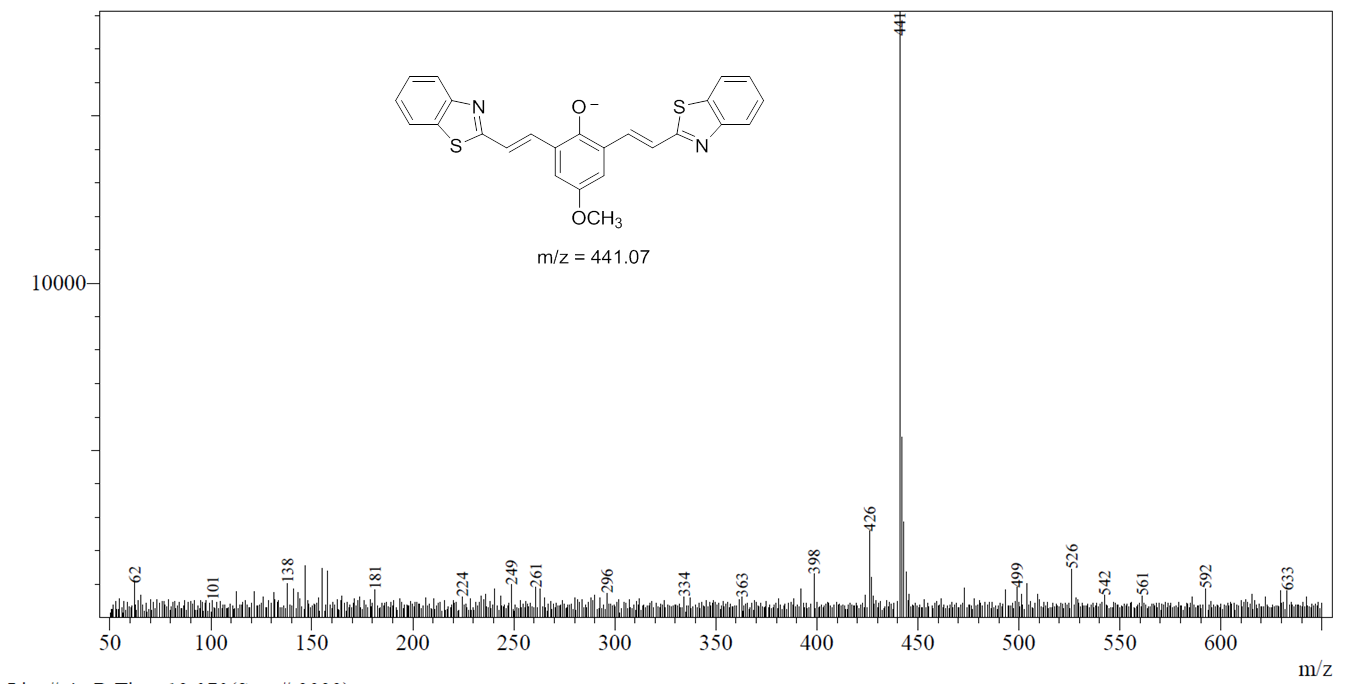
**

**Figure S2** ESI spectrum of **HBT-Cys** upon addition of 10 equiv of Cys.

**Figure S3** 1H NMR spectrum of **1**.

**Figure S4** 13C NMR spectrum of **1**.

**Figure S5** 1H NMR spectrum of **2**.

**Figure S6** 13C NMR spectrum of **2**.

**Figure S7** 1H NMR spectrum of **HBT-Cys**.

**Figure S8** 13C NMR spectrum of **HBT-Cys**.

**
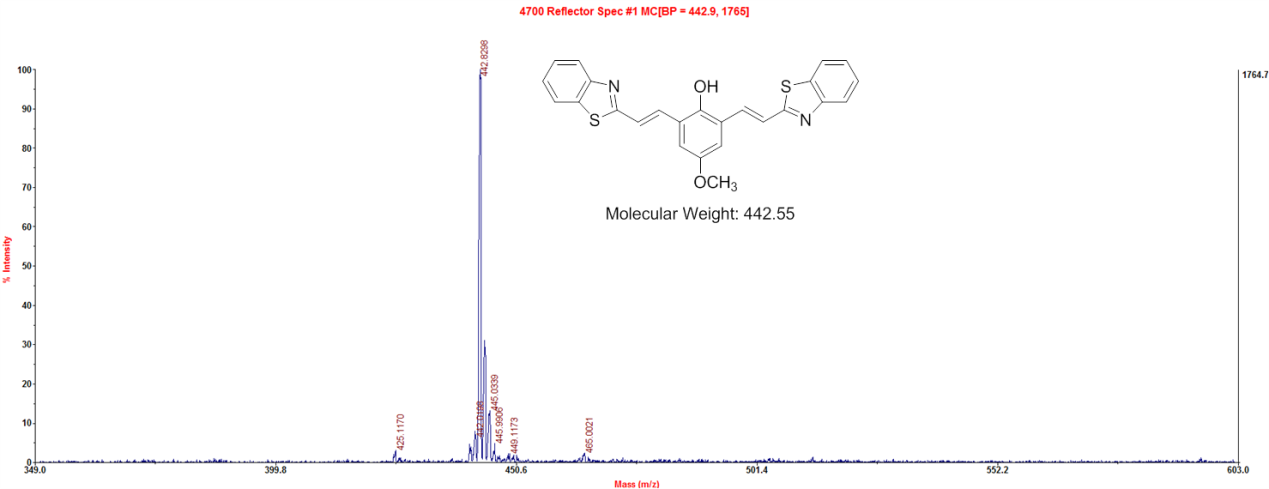
**

**Figure S9** MALDI-TOF-MS spectrum of **2**.

**
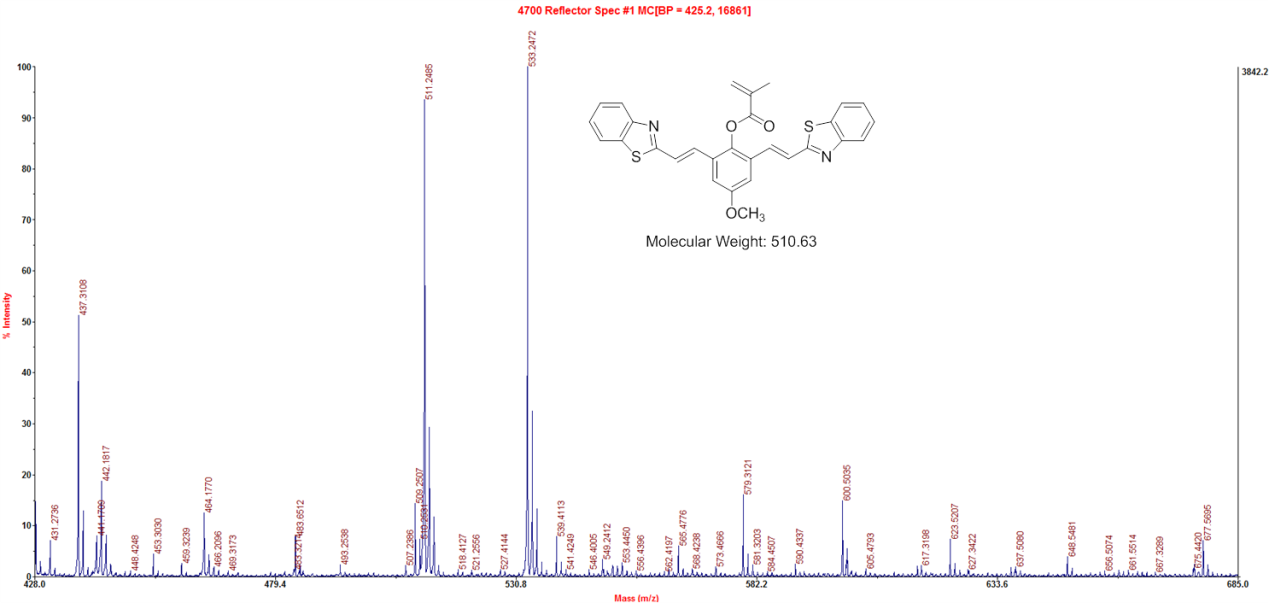
**

**Figure S10** MALDI-TOF-MS spectrum of **HBT-Cys**.
